# Supplementary material for: Effective regulation on catalytic performance of nickel–iron–vanadium layered double hydroxide for urea oxidationviasulfur incorporation
Source: Royal Society of Chemistry journal article supplement (doi:10.1039/d2ma01066f), 2023-01-01
Supplement: d2ma01066f1.pdf [file d2ma01066f1.pdf]

## Effective Regulation on Catalytic Performance of Nickel-Iron-Vanadium Layered Double Hydroxide for Urea Oxidation via Sulfur Incorporation

Kai Peng<sup>a</sup>, Liyan Liu<sup>a</sup>, Narayanamoorthy Bhuvanendran<sup>b</sup>, Fen Qiao<sup>c</sup>, Guangping Lei<sup>d</sup>,  
Sae Youn Lee<sup>b</sup>, Qian Xu<sup>a</sup> Huaneng Su<sup>a,\*</sup>

<sup>a</sup> *Institute for Energy Research, Jiangsu University, 301 Xuefu Road, Zhenjiang 212013, PR China.*

<sup>b</sup> *Department of Energy & Materials Engineering, Dongguk University, Seoul 04620, Republic of Korea.*

<sup>c</sup> *School of Energy & Power Engineering, Jiangsu University, 301 Xuefu Road, Zhenjiang 212013, PR China.*

<sup>d</sup> *School of Energy and Power Engineering, North University of China, 3 Xueyuan Road, Taiyuan 030051, Shanxi, P. R. China*

\*Corresponding author.

E-mail address: [suhuaneng@ujs.edu.cn](mailto:suhuaneng@ujs.edu.cn)

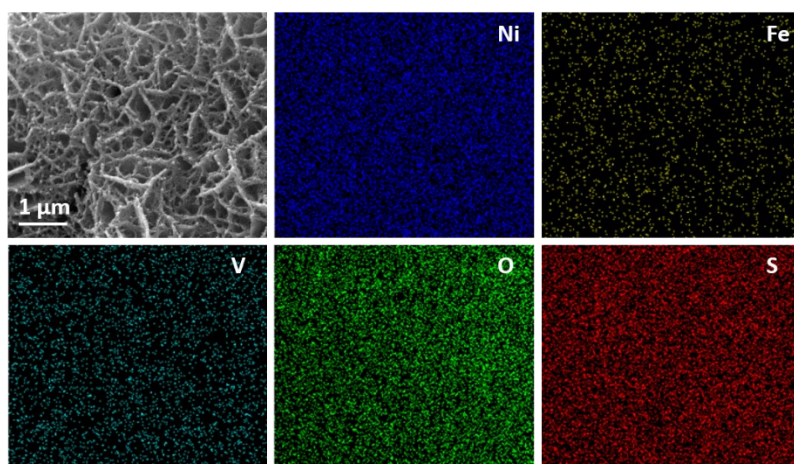

Fig. S1. SEM image and corresponding EDS mapping results of the S-NiFeV LDH catalysts.

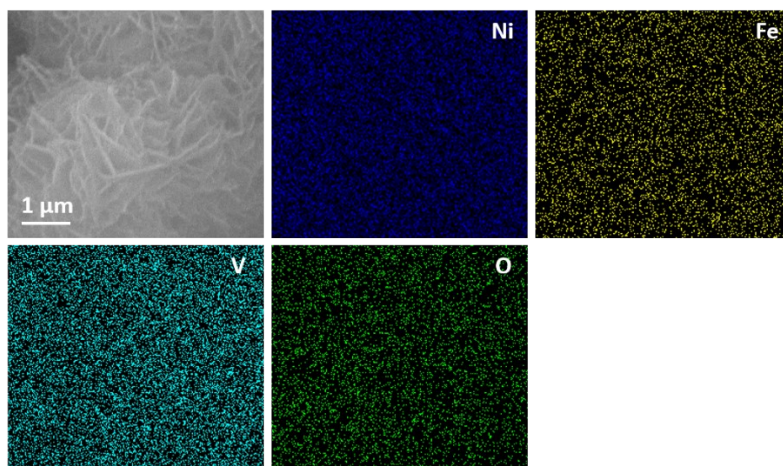

Fig. S2. SEM image and corresponding EDS mapping results of the NiFeV LDH catalysts.

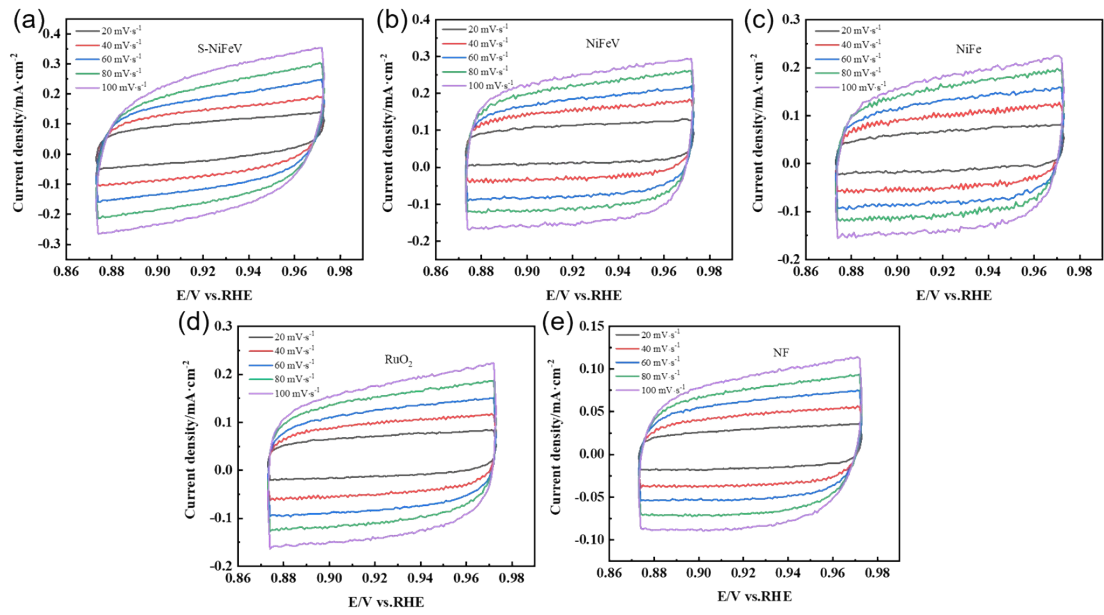

Fig. S3. CV curves record in 1 M KOH with scan rates from 20 to 100  $\text{mV s}^{-1}$  for (a) S-NiFeV LDH, (b) NiFeV LDH, (c) NiFe LDH, (d) RuO<sub>2</sub>, and (e) bare NF.

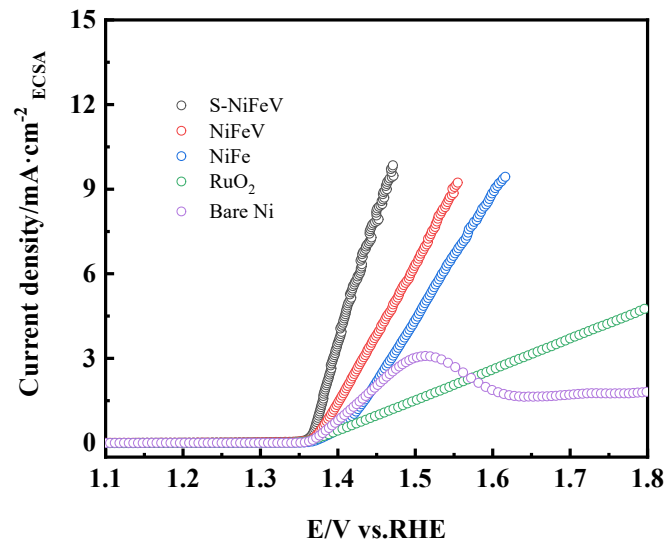

Fig. S4. Polarization curves of different electrode normalized ECSAs.

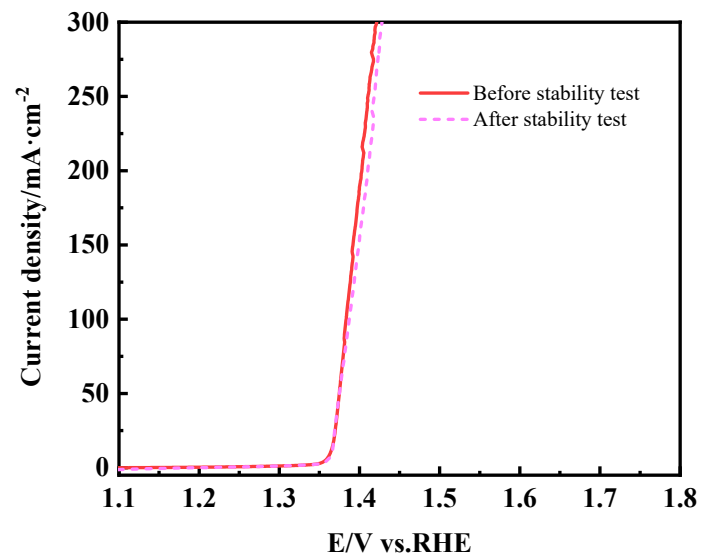

Fig. S5. The polarization curves of the S-NiFeV LDH sample before and after stability measurement.

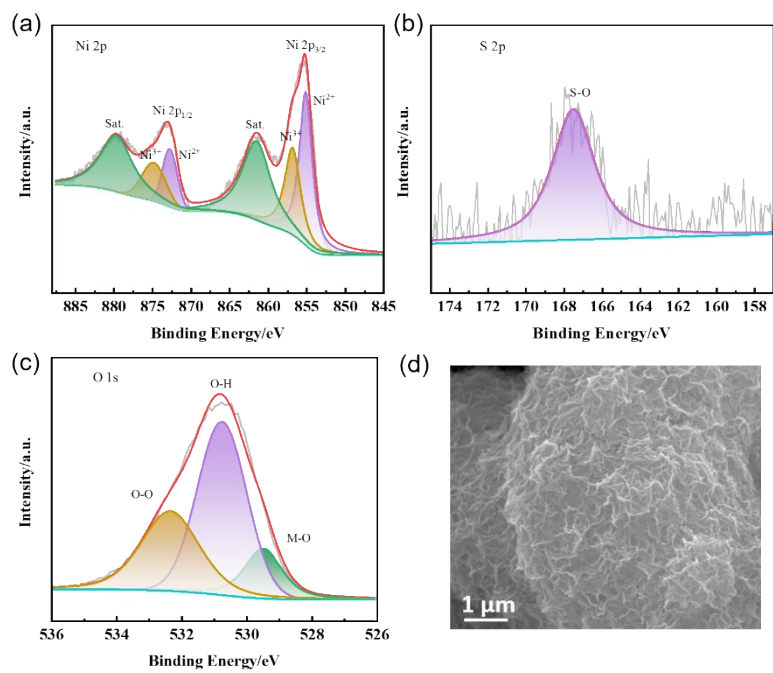

Fig. S6. XPS spectra of (a) Ni 2p, (b) S 2p and (c) O 1s in the S-NiFeV LDH after stability test. (d) SEM image of S-NiFeV LDH after stability test.

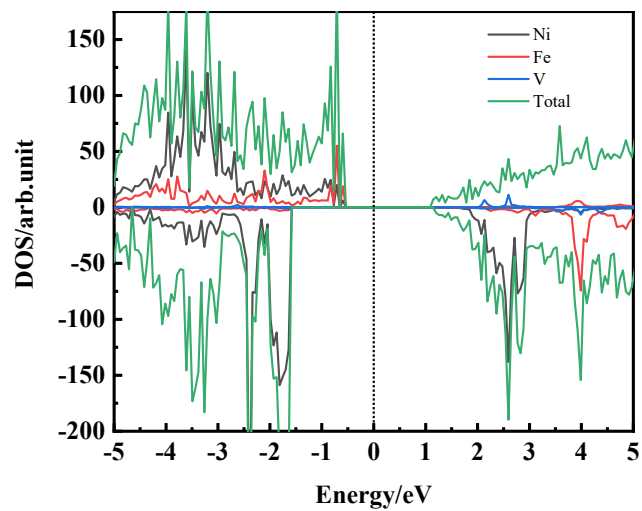

Fig. S7. Density of states (DOS) of the NiFeV LDH sample.



Table S1. Comparison of UOR performance for the S-NiFeV LDH and other previously reported catalysts.

| Catalysts                               | Electrolyte                | Current density<br>(mA·cm <sup>-2</sup> ) | Potential<br>(mV vs. RHE) | Tafel<br>(mV/dec) | Ref. |
|-----------------------------------------|----------------------------|-------------------------------------------|---------------------------|-------------------|------|
| O-NiMoP/NF                              | 1 M KOH and 0.5 M urea     | 100                                       | 1.41                      | 34                | 1    |
| Ni <sub>3</sub> N/NF                    | 1 M KOH and 0.5 M urea     | 100                                       | 1.42                      | 41                | 2    |
| Ni-DMAP-2/NF                            | 1 M KOH and 0.5 M urea     | 100                                       | 1.45                      | 23                | 3    |
| Co-doped<br>NiMoO <sub>4</sub>          | 1 M KOH and 0.5 M urea     | 100                                       | 1.38                      | 38.5              | 4    |
| O <sub>vac</sub> -V-Ni(OH) <sub>2</sub> | 1 M KOH and 0.33 M<br>urea | 100                                       | 1.47                      | 29.12             | 5    |
| NiCoP                                   | 1 M KOH and 0.5 M urea     | 100                                       | 1.42                      | 59                | 6    |
| Ni-Mo-P/CP                              | 1 M KOH and 0.33 M<br>urea | 100                                       | 1.39                      | 27                | 7    |
| P-NiFeO <sub>x</sub> H <sub>y</sub>     | 1 M KOH and 0.33 M<br>urea | 10                                        | 1.37                      | 72.6              | 8    |
| Ce-Co <sub>3</sub> O <sub>4</sub>       | 1 M KOH and 0.5 M urea     | 50                                        | 1.39                      | 30.5              | 9    |
| WO <sub>3</sub> /NF-0.25                | 1 M KOH and 0.33 M<br>urea | 100                                       | 1.384                     | -                 | 10   |
| P-NiCoZn<br>LDH/NF-10%                  | 1 M KOH and 0.5 M urea     | 100                                       | 1.421                     | 70                | 11   |

|                   |                         |     |      |      |               |
|-------------------|-------------------------|-----|------|------|---------------|
| Ni <sub>2</sub> P | 1 M KOH and 0.5 M urea  | 50  | 1.34 | 46.3 | <sup>12</sup> |
| SS-NiCo-0.5       | 1 M KOH and 0.33 M urea | 100 | 1.34 | 48.2 | <sup>13</sup> |
| S-NiFeV LDH       | 1 M KOH and 0.33 M urea | 100 | 1.38 | 30.1 | This work     |

## Reference

1. H. Jiang, M. Sun, S. Wu, B. Huang, C.-S. Lee and W. Zhang, *Advanced Functional Materials*, 2021, **31**, 2104951.
2. S. Hu, C. Feng, S. Wang, J. Liu, H. Wu, L. Zhang and J. Zhang, *ACS Applied Materials & Interfaces*, 2019, **11**, 13168-13175.
3. H. Jiang, S. Bu, Q. Gao, J. Long, P. Wang, C.-S. Lee and W. Zhang, *Materials Today Energy*, 2022, **27**, 101024.
4. X. Liu, H. Qin, G. Wang, Q. Li, Q. Huang, Z. Wen and S. Mao, *Journal of Materials Chemistry A*, 2022, **10**, 16825-16833.
5. H. Qin, Y. Ye, J. Li, W. Jia, S. Zheng, X. Cao, G. Lin and L. Jiao, *Advanced Functional Materials*, 2022, **n/a**, 2209698.
6. X. Ding, L. Pei, Y. Huang, D. Chen and Z. Xie, *Small*, 2022, **n/a**, 2205547.
7. J. Li, F. Hu, J. Hei, G. Liu, H. Wei, N. Wang and H. Wei, *Dalton Transactions*, 2022, DOI: 10.1039/D2DT02983A.
8. Q. Li, Q. Chen, S. Lei, M. Zhai, G. Lv, M. Cheng, L. Xu, H. Xu, Y. Deng and J. Bao, *Journal of Colloid and Interface Science*, 2023, **631**, 56-65.

9. H. Wang, X. Du, X. Zhang and L. Li, *Journal of Colloid and Interface Science*, 2023, **630**, 512-524.
10. W. Xu, L. Zhu, Z. Sun, H. Xue, L. Guo, Y. Feng, C. Li, H. Li, Y. Wang, Q. Liang and H.-b. Sun, *ChemSusChem*, 2022, **n/a**, e202201584.
11. Z. Yang, Y. Zhang, C. Feng, H. Wu, Y. Ding and H. Mei, *International Journal of Hydrogen Energy*, 2021, **46**, 25321-25331.
12. J. Kang, C. Sheng, J. Wang, H. Xu, B. Zhao, S. Chen, Y. Qing and Y. Wu, *International Journal of Hydrogen Energy*, 2022, DOI: <https://doi.org/10.1016/j.ijhydene.2022.11.210>.
13. Z. Zhang, J. Yang, J. Liu, Z.-G. Gu and X. Yan, *Electrochimica Acta*, 2022, **426**, 140792.
